# Supplementary material for: Routine Postoperative Antibiotic Prophylaxis Offers No Benefit after Hepatectomy—A Systematic Review and Meta-Analysis
Source: MDPI journal article supplement (doi:10.3390/antibiotics11050649), 2022-05-12
Supplement: s1 [file s1]

## Supplementary Materials

Table S1. Search strategy.

| Database | Search strategy                                                                                                                                                                                                                                                                                                                                                                                                                                                                                                                                                                                                                                                                                                                                                                                                                                                                                                                                                                                                                                                                                                                                                                                                                                                                                                                                                                                                                                                                             |
|----------|---------------------------------------------------------------------------------------------------------------------------------------------------------------------------------------------------------------------------------------------------------------------------------------------------------------------------------------------------------------------------------------------------------------------------------------------------------------------------------------------------------------------------------------------------------------------------------------------------------------------------------------------------------------------------------------------------------------------------------------------------------------------------------------------------------------------------------------------------------------------------------------------------------------------------------------------------------------------------------------------------------------------------------------------------------------------------------------------------------------------------------------------------------------------------------------------------------------------------------------------------------------------------------------------------------------------------------------------------------------------------------------------------------------------------------------------------------------------------------------------|
| MEDLINE  | ("anti bacterial agents"[Pharmacological Action]<br>OR "anti bacterial agents"[MeSH Terms] OR<br>("anti bacterial"[All Fields] AND "agents"[All<br>Fields]) OR "anti bacterial agents"[All Fields]<br>OR "antibiotic"[All Fields] OR "antibiotics"[All<br>Fields] OR "antibiotic s"[All Fields] OR<br>"antibiotical"[All Fields] OR ("anti bacterial<br>agents"[Pharmacological Action] OR "anti<br>bacterial agents"[MeSH Terms] OR ("anti<br>bacterial"[All Fields] AND "agents"[All Fields])<br>OR "anti bacterial agents"[All Fields] OR<br>"antibiotic"[All Fields] OR "antibiotics"[All<br>Fields] OR "antibiotic s"[All Fields] OR<br>"antibiotical"[All Fields]) OR ("anti bacterial<br>agents"[Pharmacological Action] OR "anti<br>bacterial agents"[MeSH Terms] OR ("anti<br>bacterial"[All Fields] AND "agents"[All Fields])<br>OR "anti bacterial agents"[All Fields] OR<br>"antibacterial"[All Fields] OR "antibacterials"[All<br>Fields] OR "antibacterially"[All Fields]) OR<br>("anti infective agents"[Pharmacological Action]<br>OR "anti infective agents"[MeSH Terms] OR<br>("anti infective"[All Fields] AND "agents"[All<br>Fields]) OR "anti infective agents"[All Fields]<br>OR "antimicrobial"[All Fields] OR<br>"antimicrobials"[All Fields] OR<br>"antimicrobially"[All Fields])) AND<br>("hepatectomy"[MeSH Terms] OR<br>"hepatectomy"[All Fields] OR<br>"hepatectomies"[All Fields] OR "liver<br>resection"[All Fields] OR "hepatic resection"[All<br>Fields]) |
